# Supplementary material
Source: PubMed Central journal article supplement (PMC394245)
Supplement: 7600191s1.pdf [file 7600191s1.pdf]

***Tcf4<sup>+/-</sup>/Tcf1<sup>-/-</sup>***

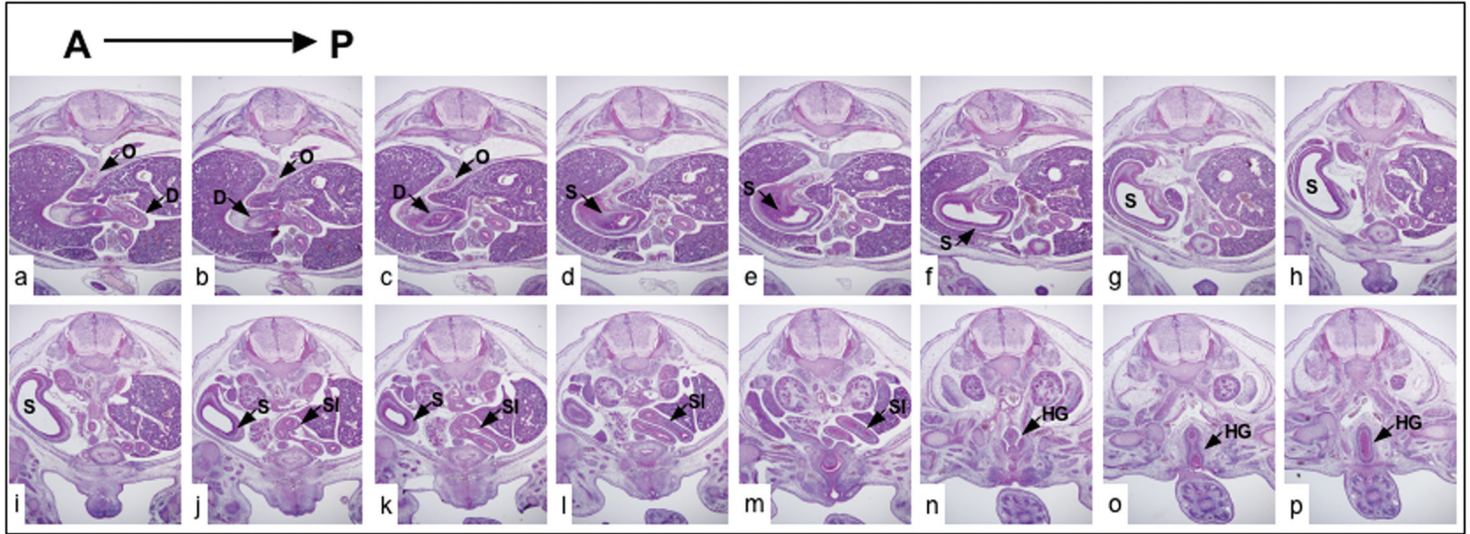

***Tcf4<sup>-/-</sup>/Tcf1<sup>-/-</sup>***

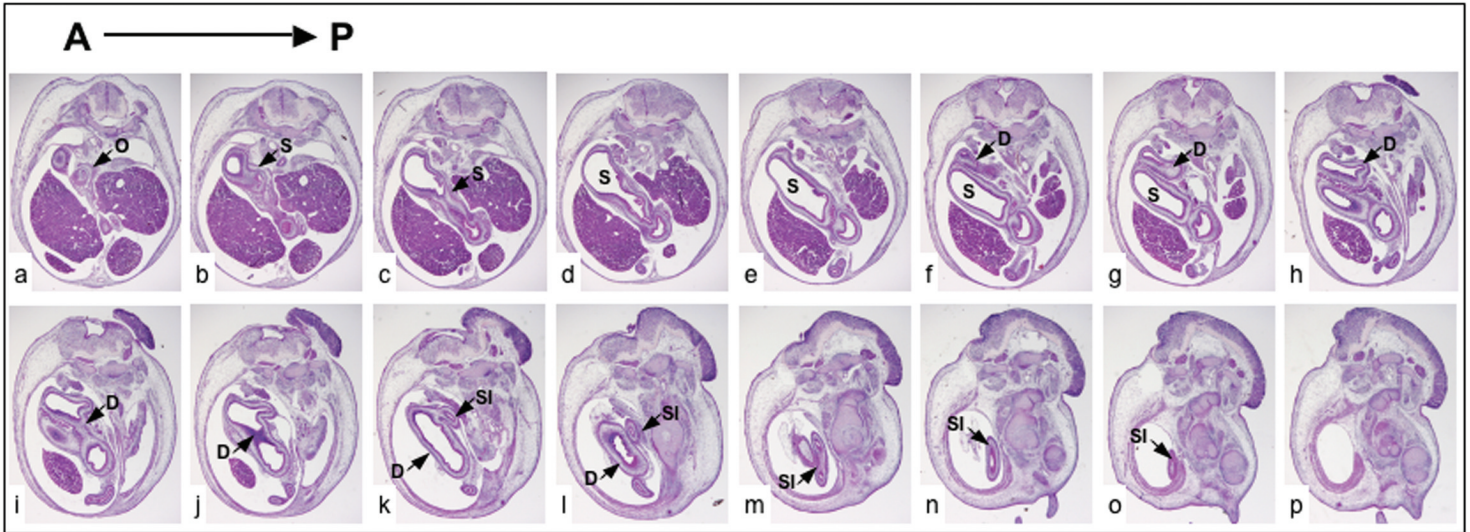

Supplementary Figure 1. Morphology of gastro-intestinal tract of *Tcf4<sup>-/-</sup>/Tcf1<sup>-/-</sup>* embryos. Consecutive transverse sections (a-p) from the anterior (A) to the posterior (P) end of *Tcf4<sup>+/-</sup>/Tcf1<sup>-/-</sup>* and *Tcf4<sup>-/-</sup>/Tcf1<sup>-/-</sup>* embryos. Sections were stained with hematoxylin and eosin. Various structures are identified as follows: (S) stomach, (D) duodenum, (SI) small intestine, (O) oesophagus, (HG) hindgut. As shown in the top panels the morphology of the stomach is normal in *Tcf4<sup>+/-</sup>/Tcf1<sup>-/-</sup>* littermates with clear boundaries set by the oesophagus and duodenum. In *Tcf4<sup>-/-</sup>/Tcf1<sup>-/-</sup>* mutants the gastro-duodenal junction in *Tcf4<sup>-/-</sup>/Tcf1<sup>-/-</sup>* embryos is not clearly defined. Note how in bottom panels m-o the small intestine ends blindly in the abdominal cavity of *Tcf4<sup>-/-</sup>/Tcf1<sup>-/-</sup>* embryos.
